# Supplementary material for: HtrA1 as a promising tissue marker in cancer: a meta-analysis
Source: PubMed Central journal article supplement (PMC5801749; doi:10.1186/s12885-018-4041-2), 2018-02-06

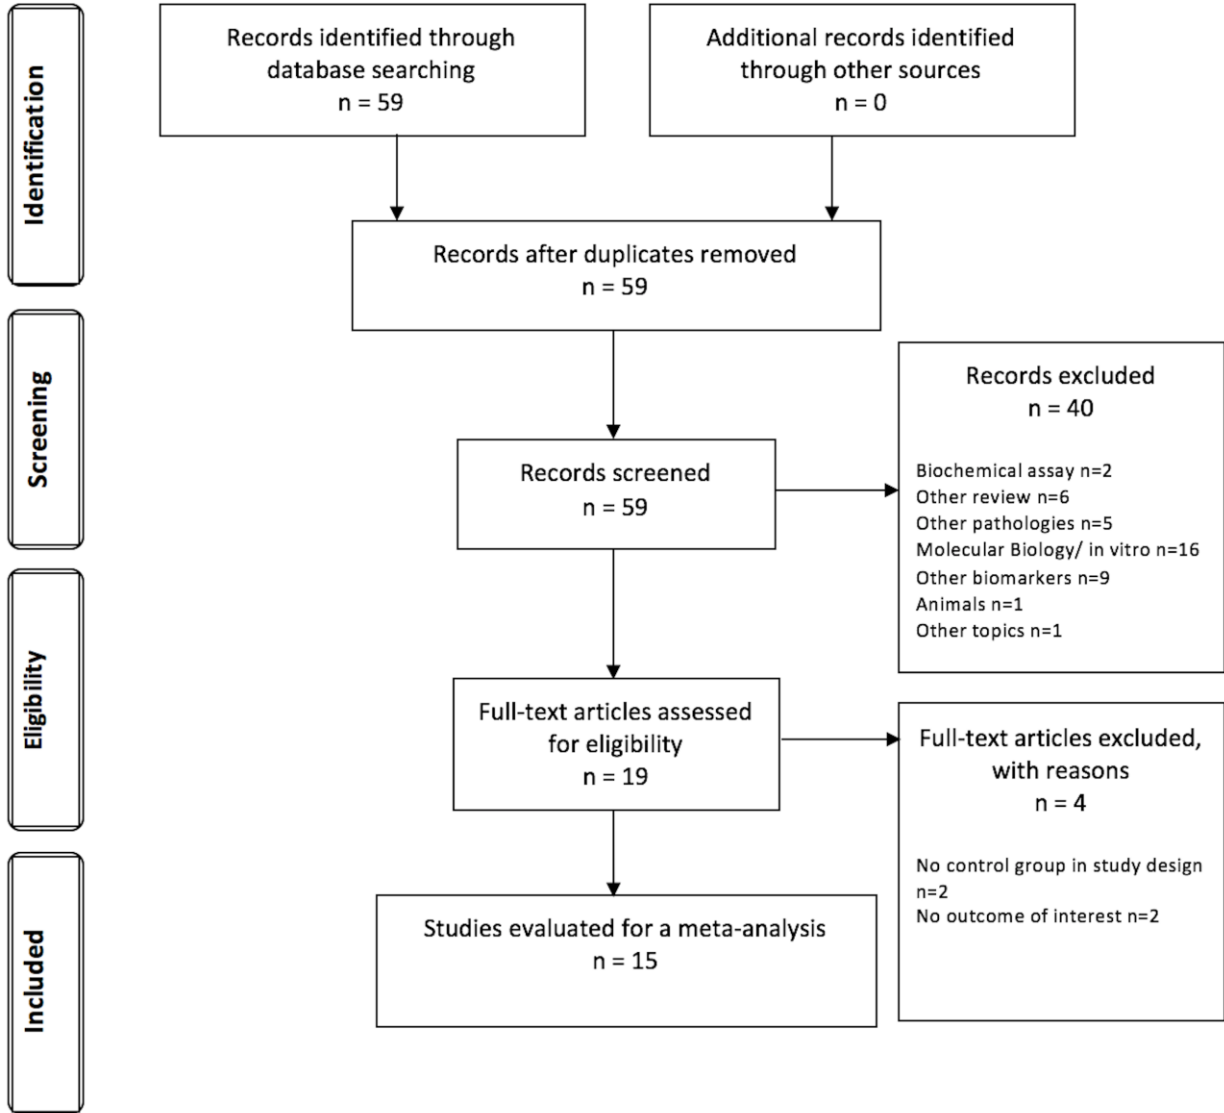

Supplement: 12885_2018_4041_MOESM1_ESM.pdf [file 12885_2018_4041_MOESM1_ESM.pdf]
