# Supplementary material for: HtrA1 as a promising tissue marker in cancer: a meta-analysis
Source: Springer Nature journal article supplement (doi:10.1186/s12885-018-4041-2), 2018-02-06
Supplement: MOESM4 [file 15442830]

**Supplementary Table 3:** New Castle-Ottawa scale assesment for case-control studies

| Study ID                                  | Selection                       |                                 | Comparability         |                        | Exposure                                                                   |                           |                                                     |
|-------------------------------------------|---------------------------------|---------------------------------|-----------------------|------------------------|----------------------------------------------------------------------------|---------------------------|-----------------------------------------------------|
|                                           | Is the case definition adequate | Representativeness of the cases | Selection of Controls | Definition of Controls | Comparability of cases and controls on the basis of the design or analysis | Ascertainment of exposure | Same method of ascertainment for cases and controls |
| <b>Zhu</b><br><b>(Liver, mRNA)</b>        | <b>*A</b>                       | <b>*B</b>                       | <b>B</b>              | <b>*A</b>              | <b>*B</b>                                                                  | <b>*A</b>                 | <b>*A</b>                                           |
| <b>Zhao</b>                               | <b>*A</b>                       | <b>*A</b>                       | <b>B</b>              | <b>*A</b>              | <b>*B</b>                                                                  | <b>*A</b>                 | <b>*A</b>                                           |
| <b>Lorenzi</b>                            | <b>*A</b>                       | <b>*A</b>                       | <b>B</b>              | <b>*A</b>              | <b>*B</b>                                                                  | <b>*A</b>                 | <b>*A</b>                                           |
| <b>Lehner</b>                             | <b>*A</b>                       | <b>*A</b>                       | <b>B</b>              | <b>*A</b>              | <b>*B</b>                                                                  | <b>*A</b>                 | <b>*A</b>                                           |
| <b>Yu</b>                                 | <b>*A</b>                       | <b>*A</b>                       | <b>B</b>              | <b>*A</b>              | <b>*B</b>                                                                  | <b>*A</b>                 | <b>*A</b>                                           |
| <b>Xia</b>                                | <b>*A</b>                       | <b>*A</b>                       | <b>B</b>              | <b>*A</b>              | <b>*B</b>                                                                  | <b>*A</b>                 | <b>*A</b>                                           |
| <b>Zhu</b><br><b>(Liver, protein)</b>     | <b>*A</b>                       | <b>*B</b>                       | <b>B</b>              | <b>*A</b>              | <b>*B</b>                                                                  | <b>*A</b>                 | <b>*A</b>                                           |
| <b>Catalano</b>                           | <b>*A</b>                       | <b>*A</b>                       | <b>B</b>              | <b>*A</b>              | <b>*B</b>                                                                  | <b>*A</b>                 | <b>*A</b>                                           |
| <b>Zurawa-Janika</b>                      | <b>*A</b>                       | <b>*B</b>                       | <b>B</b>              | <b>*A</b>              | <b>*B</b>                                                                  | <b>*A</b>                 | <b>*A</b>                                           |
| <b>Mullany</b>                            | <b>*A</b>                       | <b>*A</b>                       | <b>B</b>              | <b>*A</b>              | <b>*B</b>                                                                  | <b>*A</b>                 | <b>*A</b>                                           |
| <b>Narkiewicz</b><br><b>(endometrium)</b> | <b>*A</b>                       | <b>*A</b>                       | <b>B</b>              | <b>*A</b>              | <b>*B</b>                                                                  | <b>*A</b>                 | <b>*A</b>                                           |
| <b>Bowden</b>                             | <b>*A</b>                       | <b>*A</b>                       | <b>B</b>              | <b>*A</b>              | <b>*B</b>                                                                  | <b>*A</b>                 | <b>*A</b>                                           |
| <b>Baldi</b>                              | <b>*A</b>                       | <b>*A</b>                       | <b>B</b>              | <b>*A</b>              | <b>*B</b>                                                                  | <b>*A</b>                 | <b>*A</b>                                           |
| <b>Narkiewicz</b>                         | <b>*A</b>                       | <b>*A</b>                       | <b>B</b>              | <b>*A</b>              | <b>*B</b>                                                                  | <b>*A</b>                 | <b>*A</b>                                           |

---

(ovary)

---

### **Selection**

- 1) Is the case definition adequate? a) yes, with independent validation ✱ b) yes, eg record linkage or based on self reports c) no description
- 2) Representativeness of the cases a) consecutive or obviously representative series of cases ✱ b) potential for selection biases or not stated
- 3) Selection of Controls a) community controls ✱ b) hospital controls c) no description
- 4) Definition of Controls a) no history of disease (endpoint) ✱ b) no description of source

### **Comparability**

- 1) Comparability of cases and controls on the basis of the design or analysis
  - a) study controls for age and sex ✱
  - b) study controls for any additional factor ✱

### **Exposure**

- 1) Ascertainment of exposure a) secure record (eg surgical records) ✱ b) structured interview where blind to case/control status ✱
  - c) interview not blinded to case/control status d) written self report or medical record only e) no description
- 2) Same method of ascertainment for cases and controls a) yes ✱ b) no
