# Supplementary material for: HtrA1 as a promising tissue marker in cancer: a meta-analysis
Source: Springer Nature journal article supplement (doi:10.1186/s12885-018-4041-2), 2018-02-06
Supplement: MOESM5 [file 15442830]

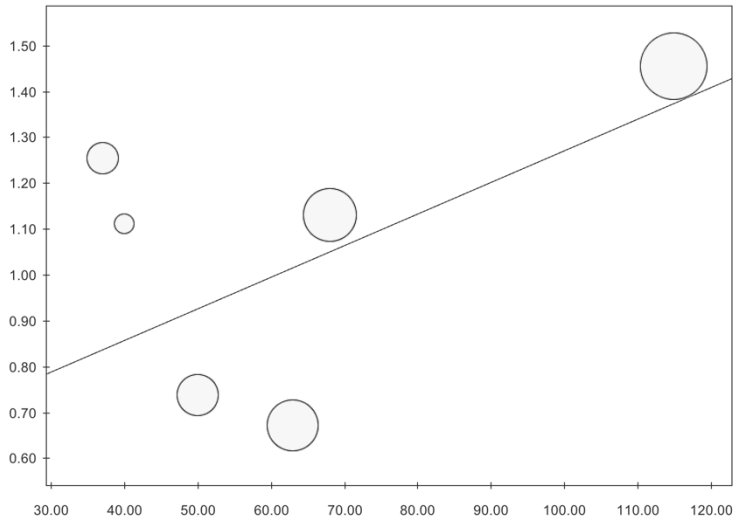

A.

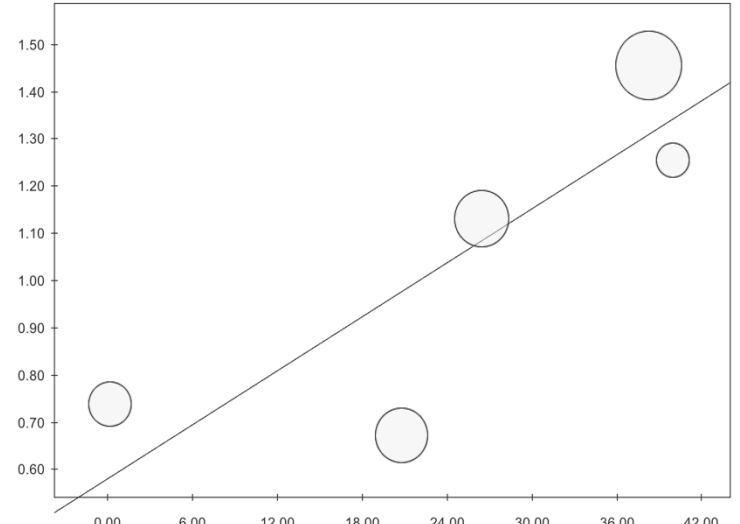

B.

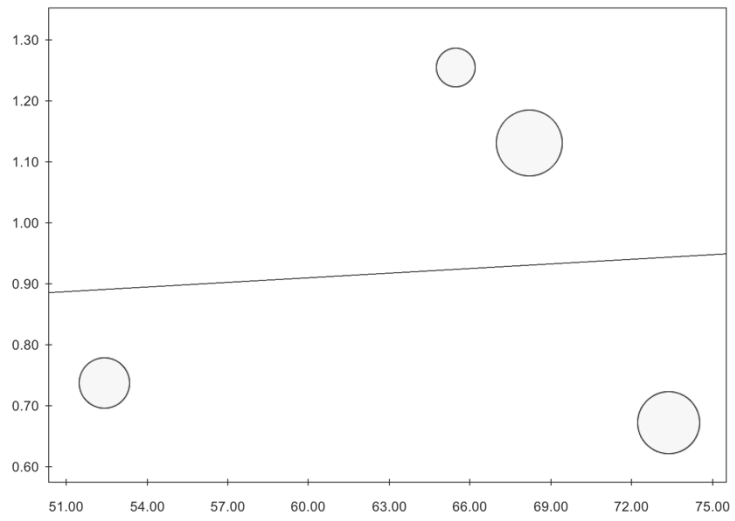

C.

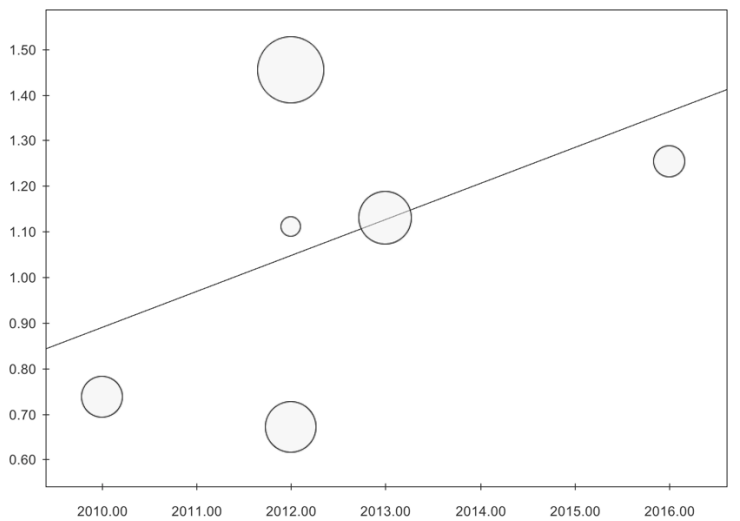

D.

FIGURE S2. Normal-Looking Tissue. Meta-regression of HtrA1 protein: A. Sample size, B. % Female, C. Mean age of entire sample, D. Publication year
